# Supplementary material
Source: publisher site journal article supplement (https://kjim.org/upload/media/kjim-2024-339-Supplementary-Table-1.pdf)
Supplement: Supplementary file 1 [file kjim-2024-339-Supplementary-Table-1.pdf]

**Supplementary Table 1. Random forest classifier analysis of gastric juice samples by groups**

| Act. group                  | Pred. group (train set) |    |    |    | Correctly classified | Pred. group (test set) |    |    |    | Correctly classified |
|-----------------------------|-------------------------|----|----|----|----------------------|------------------------|----|----|----|----------------------|
|                             | Control                 | LG | HG | GC |                      | Control                | LG | HG | GC |                      |
| Control                     | 52                      | 0  | 20 | 0  | 72.2%                | 18                     | 0  | 10 | 0  | 64.3%                |
| LG                          | 13                      | 32 | 15 | 9  | 46.4%                | 2                      | 19 | 9  | 1  | 61.3%                |
| HG                          | 20                      | 8  | 39 | 2  | 56.5%                | 0                      | 3  | 24 | 4  | 77.4%                |
| GC                          | 11                      | 8  | 18 | 33 | 47.1%                | 2                      | 3  | 9  | 16 | 53.3%                |
| Overall correct class. Rate |                         |    |    |    | 55.7%                | 64.2%                  |    |    |    |                      |

The random forest classifier was performed using *Cutibacterium acnes* and *Streptococcus oralis*, identified as group-discriminative by MaAsLin2 analysis of gastric juice samples. To address sample imbalance, SMOTE was applied, generating a balanced dataset of 100 samples.

Pred., predicted group; Act., actual group; LG, low-grade dysplasia; HG, high-grade dysplasia; GC, gastric cancer.
